# Supplementary material
Source: Springer Nature journal article supplement (https://www.springermedizin.de/resource/supplementary/12874_2011_673_MOESM8_ESM.pdf/9432352)
Supplement: MOESM8 [file 9432352]

Patients

20000  
18000  
16000  
14000  
12000  
10000  
8000  
6000  
4000  
2000  
0

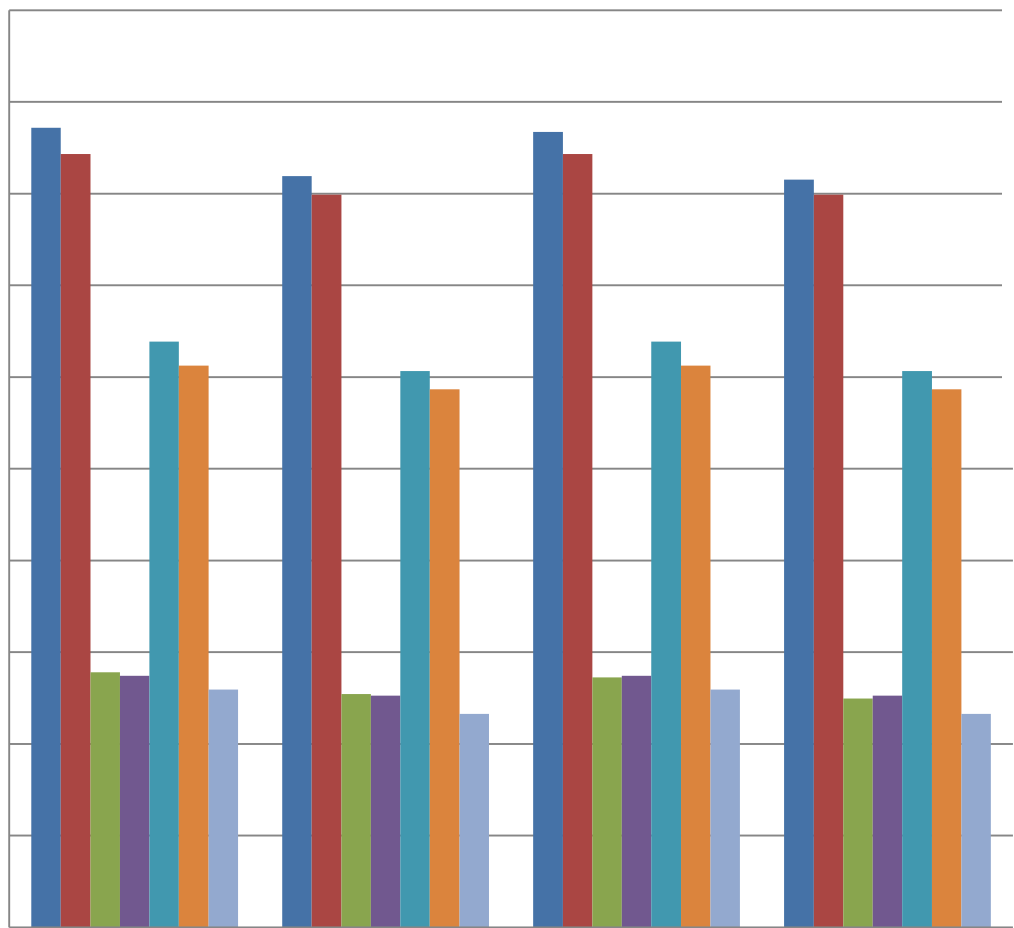

- Clinical Inpatient (all)
- Financial Inpatient (all)
- Clinical Inpatient (historical)
- Financial Inpatient (historical)
- Clinical Inpatient (current)
- Financial Inpatient (current)
- Outpatient

Warfarin by Description    Warfarin & INR by Description    Warfarin by CMT    Warfarin & INR by CMT
